# Supplementary material for: Healthy Lifestyle Is Associated with Reduced Mortality in Patients with Non-Alcoholic Fatty Liver Disease
Source: MDPI journal article supplement (doi:10.3390/nu14183785), 2022-09-14

# Healthy Lifestyle Is Associated with Reduced Mortality in Patients with Non-Alcoholic Fatty Liver Disease

Chengxiao Yu <sup>1,2,†</sup>, Jiaxin Gao <sup>1,†</sup>, Xinyuan Ge <sup>1</sup>, Xiao Wang <sup>3</sup>, Yuqing Ding <sup>1</sup>, Ting Tian <sup>1</sup>, Xin Xu <sup>1</sup>, Wen Guo <sup>4</sup>, Quanrongzi Wang <sup>5</sup>, Zijun Ge <sup>6</sup>, Tao Jiang <sup>1</sup>, Qun Zhang <sup>4,\*</sup> and Ci Song <sup>1,7,\*</sup>

## Contents

- Table S1. Association between healthy lifestyle categories or NAFLD status and all-cause mortality.
- Table S2. Age, sex, ethnicity-adjusted and multivariate hazard ratio of risk factor for the all-cause mortality according to healthy lifestyle factors and individual components.
- Table S3. Association between the healthy lifestyle factors or individual components and all-cause mortality according to NAFLD status.
- Table S4. Risk of mortality according to lifestyle categories after excluding incidents during the first year of follow-up.
- Table S5. Risk of mortality according to lifestyle categories after excluding incidents during the first three years of follow-up.
- Table S6. Multivariable-adjusted HRs (95% CIs) for mortality by healthy lifestyle categories according to baseline characteristics.
- Table S7. Association between combinations of the healthy lifestyle factors (Prevalence >5%) and risk of liver cancer.
- Figure S1. Association between combinations of the healthy lifestyle factors (Proportion >5%) and risk of all-cause mortality/cardiovascular mortality/cancer mortality in the sub cohort without NAFLD.

**Table S1. Association between healthy lifestyle categories or NAFLD status and all-cause mortality.**

|                                   |                        | Age, sex, ethnicity-adjusted |         | Multivariate model      |         |
|-----------------------------------|------------------------|------------------------------|---------|-------------------------|---------|
|                                   |                        | HR(95% CI) <sup>a</sup>      | P value | HR(95% CI) <sup>b</sup> | P value |
| <b>Healthy Lifestyle Category</b> |                        |                              |         |                         |         |
|                                   | Unfavorable Lifestyle  | 1 [Reference]                |         | 1 [Reference]           |         |
|                                   | Intermediate Lifestyle | 0.67 (0.58-0.76)             | <0.001  | 0.70 (0.62-0.80)        | <0.001  |
|                                   | Favorable Lifestyle    | 0.54 (0.45-0.63)             | <0.001  | 0.60 (0.51-0.71)        | <0.001  |
| <b>NAFLD</b>                      |                        |                              |         |                         |         |
|                                   | No NAFLD               | 1 [Reference]                |         | 1 [Reference]           |         |
|                                   | NAFLD                  | 1.17 (1.08-1.26)             | <0.001  | 1.07 (0.98-1.16)        | 0.115   |
| <b>Hepatic Steatosis</b>          |                        |                              |         |                         |         |
|                                   | Normal                 | 1 [Reference]                |         | 1 [Reference]           |         |
|                                   | Mild                   | 1.16 (1.01-1.33)             | 0.042   | 1.09 (0.95-1.25)        | 0.196   |
|                                   | Moderate               | 1.17 (1.06-1.29)             | 0.001   | 1.03 (0.93-1.13)        | 0.581   |
|                                   | Severe                 | 1.18 (0.98-1.42)             | 0.074   | 1.12 (0.94-1.33)        | 0.217   |

<sup>a</sup> Analyses were adjusted for age, sex, ethnicity.

<sup>b</sup> Analyses were adjusted for age, sex, ethnicity, poverty status, education level, body mass index, and prevalent comorbidities (including history of CVD, cancer, chronic bronchitis or emphysema).

**Table S2. Age, sex, ethnicity-adjusted and multivariate hazard ratio of risk factor for the all-cause mortality according to healthy lifestyle factors and individual components.**

|                                                             |         | Age, sex, ethnicity-adjusted |         | Multivariate model      |         |
|-------------------------------------------------------------|---------|------------------------------|---------|-------------------------|---------|
|                                                             |         | HR(95% CI) <sup>a</sup>      | P value | HR(95% CI) <sup>b</sup> | P value |
| <b>Healthy Lifestyle Score</b>                              |         |                              |         |                         |         |
|                                                             | Score 0 | 1 [Reference]                |         | 1 [Reference]           |         |
|                                                             | Score 1 | 0.74 (0.65-0.84)             | <0.001  | 0.78 (0.68-0.89)        | <0.001  |
|                                                             | Score 2 | 0.55 (0.47-0.65)             | <0.001  | 0.60 (0.51-0.71)        | <0.001  |
|                                                             | Score 3 | 0.45 (0.38-0.54)             | <0.001  | 0.53 (0.44-0.64)        | <0.001  |
|                                                             | Score 4 | 0.40 (0.30-0.53)             | <0.001  | 0.49 (0.37-0.66)        | <0.001  |
| One-point increase in the healthy lifestyle score           |         | 0.77 (0.73-0.81)             | <0.001  | 0.80 (0.76-0.85)        | <0.001  |
| <b>Individual component of healthy lifestyle categories</b> |         |                              |         |                         |         |
| <b>Ever smoked 100 cigarettes</b>                           |         |                              |         |                         |         |
|                                                             | Yes     | 1 [Reference]                |         | 1 [Reference]           |         |
|                                                             | No      | 0.57 (0.51-0.63)             | <0.001  | 0.60 (0.54-0.66)        | <0.001  |
| <b>Ever had 12 drinks</b>                                   |         |                              |         |                         |         |
|                                                             | Yes     | 1 [Reference]                |         | 1 [Reference]           |         |
|                                                             | No      | 0.92 (0.77-1.11)             | 0.939   | 0.85 (0.72-1.01)        | 0.060   |
| <b>Regular physical activity</b>                            |         |                              |         |                         |         |
|                                                             | No      | 1 [Reference]                |         | 1 [Reference]           |         |
|                                                             | Yes     | 0.81 (0.72-0.90)             | <0.001  | 0.90 (0.81-0.99)        | 0.039   |
| <b>Healthy dietary pattern</b>                              |         |                              |         |                         |         |
|                                                             | No      | 1 [Reference]                |         | 1 [Reference]           |         |
|                                                             | Yes     | 0.74 (0.67-0.83)             | <0.001  | 0.82 (0.72-0.92)        | 0.001   |

<sup>a</sup> Analyses were adjusted for age, sex, ethnicity.

<sup>b</sup> Analyses were adjusted for age, sex, ethnicity, poverty status, education level, body mass index, and prevalent comorbidities (including history of hypertension, diabetes, CVD, cancer, chronic bronchitis, or emphysema).

**Table S3. Association between the healthy lifestyle factors or individual components and all-cause mortality according to NAFLD status.**

|                                                             |                                                   | NAFLD                   |         | No NAFLD                |         |
|-------------------------------------------------------------|---------------------------------------------------|-------------------------|---------|-------------------------|---------|
|                                                             |                                                   | HR(95% CI) <sup>a</sup> | P value | HR(95% CI) <sup>a</sup> | P value |
| <b>Healthy Lifestyle Category</b>                           |                                                   |                         |         |                         |         |
|                                                             | Score 0                                           | 1 [Reference]           |         | 1 [Reference]           |         |
|                                                             | Score 1                                           | 0.78 (0.62-0.98)        | 0.036   | 0.79 (0.66-0.94)        | 0.009   |
|                                                             | Score 2                                           | 0.63 (0.48-0.82)        | 0.001   | 0.59 (0.47-0.74)        | <0.001  |
|                                                             | Score 3                                           | 0.52 (0.39-0.70)        | <0.001  | 0.53 (0.41-0.69)        | <0.001  |
|                                                             | Score 4                                           | 0.62 (0.38-1.01)        | 0.057   | 0.39 (0.25-0.61)        | <0.001  |
|                                                             | One-point increase in the healthy lifestyle score | 0.82 (0.76-0.89)        | <0.001  | 0.79 (0.73-0.86)        | <0.001  |
| <b>Individual component of healthy lifestyle categories</b> |                                                   |                         |         |                         |         |
| <b>Ever smoked 100 cigarettes</b>                           |                                                   |                         |         |                         |         |
|                                                             | Yes                                               | 1 [Reference]           |         | 1 [Reference]           |         |
|                                                             | No                                                | 0.59 (0.50-0.70)        | <0.001  | 0.60 (0.52-0.69)        | <0.001  |
| <b>Ever had 12 drinks</b>                                   |                                                   |                         |         |                         |         |
|                                                             | Yes                                               | 1 [Reference]           |         | 1 [Reference]           |         |
|                                                             | No                                                | 0.88 (0.69-1.13)        | 0.309   | 0.79 (0.66-0.96)        | 0.016   |
| <b>Regular physical activity</b>                            |                                                   |                         |         |                         |         |
|                                                             | No                                                | 1 [Reference]           |         | 1 [Reference]           |         |
|                                                             | Yes                                               | 0.89 (0.72-1.10)        | 0.281   | 0.93 (0.83-1.05)        | 0.250   |
| <b>Healthy dietary pattern</b>                              |                                                   |                         |         |                         |         |
|                                                             | No                                                | 1 [Reference]           |         | 1 [Reference]           |         |
|                                                             | Yes                                               | 0.91 (0.77-1.09)        | 0.300   | 0.75 (0.65-0.88)        | <0.001  |

<sup>a</sup> Analyses were adjusted for age, sex, ethnicity, poverty status, education level, body mass index, and prevalent comorbidities (including history of hypertension, diabetes, CVD, cancer, chronic bronchitis, or emphysema).



|                                       |                   |                  |                  |                  |                  |                  |
|---------------------------------------|-------------------|------------------|------------------|------------------|------------------|------------------|
| No. of total                          | 1990 (56.56%)     | 1049 (28.62%)    | 537 (14.81%)     | 3303 (53.86%)    | 1894 (29.24%)    | 990 (16.89%)     |
| No. of cases/ Person years            | 176/39496         | 80/21491         | 31/11289         | 264/69278        | 89/41278         | 54/21326         |
| HR (95% CI) <sup>a</sup>              | 1 [Reference]     | 0.83 (0.55-1.27) | 0.49 (0.27-0.90) | 1 [Reference]    | 0.40 (0.29-0.57) | 0.41 (0.25-0.68) |
| P value <sup>a</sup>                  |                   | 0.396            | 0.022            |                  | <0.001           | <0.001           |
| P value for trend <sup>a</sup>        |                   | 0.007            |                  |                  | <0.001           |                  |
| Absolute risk, % (95% CI)             | 8.84 (7.65-10.20) | 7.63 (6.13-9.44) | 5.77 (4.02-8.18) | 7.99 (7.10-8.98) | 4.70 (3.81-5.78) | 5.45 (4.16-7.11) |
| Incidence rate per 1000 PYs (95% CI)  | 3.33 (2.79-3.97)  | 2.67 (2.09-3.41) | 1.96 (1.35-2.85) | 2.66 (2.29-3.09) | 1.37 (1.08-1.73) | 1.42 (1.06-1.91) |
| <sup>b</sup>                          |                   |                  |                  |                  |                  |                  |
| Numbers needed -20 years <sup>c</sup> |                   | 136              | 45               |                  | 35               | 36               |

<sup>a</sup> Adjusted for age, sex, ethnicity, poverty status, education level, body mass index, and prevalent comorbidities (including history of hypertension, diabetes, CVD, cancer, chronic bronchitis, or emphysema).

<sup>b</sup> Incidence rate for liver cancer are adjusted for age at baseline, gender, and ethnicity.

<sup>c</sup> The numbers needed to adhere to a healthy lifestyle to prevent one death in 20 years.

**Table S5. Risk of mortality according to lifestyle categories after excluding incidents during the first three years of follow-up.**

| Healthy Lifestyle Category            | NAFLD                 |                        |                     | No NAFLD              |                        |                     |
|---------------------------------------|-----------------------|------------------------|---------------------|-----------------------|------------------------|---------------------|
|                                       | Unfavorable Lifestyle | Intermediate Lifestyle | Favorable Lifestyle | Unfavorable Lifestyle | Intermediate Lifestyle | Favorable Lifestyle |
| All-cause mortality                   |                       |                        |                     |                       |                        |                     |
| No. of total                          | 1942 (56.51%)         | 1025 (28.56%)          | 532 (14.92%)        | 3234 (53.73%)         | 1875 (29.32%)          | 980 (16.95%)        |
| No. of cases/ Person years            | 731/39418             | 329/21448              | 144/11281           | 888/69165             | 425/41246              | 232/21309           |
| HR (95% CI) <sup>a</sup>              | 1 [Reference]         | 0.72 (0.57-0.91)       | 0.62 (0.49-0.78)    | 1 [Reference]         | 0.69 (0.58-0.83)       | 0.59 (0.48-0.73)    |
| P value <sup>a</sup>                  |                       | 0.007                  | <0.001              |                       | <0.001                 | <0.001              |
| P value for trend <sup>a</sup>        |                       | <0.001                 |                     |                       | <0.001                 |                     |
|                                       | 37.64                 | 32.10                  | 27.07               |                       | 22.67                  | 23.67               |
| Absolute risk, % (95% CI)             | (35.49-39.84)         | (29.26-35.07)          | (23.38-31.10)       | 27.46 (25.93-29.04)   | (20.80-24.64)          | (21.07-26.49)       |
| Incidence rate per 1000 PYs (95% CI)  | 12.40                 | 9.73 (8.59-11.03)      | 8.03 (6.72-9.60)    | 8.00 (7.35-8.71)      | 5.86 (5.23-6.56)       | 5.50 (4.75-6.37)    |
| <sup>b</sup>                          | (11.30-13.60)         |                        |                     |                       |                        |                     |
| Numbers needed -20 years <sup>c</sup> |                       | 23                     | 17                  |                       | 30                     | 22                  |
| Cardiovascular mortality              |                       |                        |                     |                       |                        |                     |
| No. of total                          | 1968 (56.45%)         | 1043 (28.75%)          | 535 (14.80%)        | 3279 (53.85%)         | 1890 (29.26%)          | 988 (16.89%)        |
| No. of cases/ Person years            | 201/39460             | 89/21479               | 42/11286            | 219/69239             | 128/41273              | 60/21321            |
| HR (95% CI) <sup>a</sup>              | 1 [Reference]         | 0.67 (0.40-1.10)       | 0.51 (0.32-0.81)    | 1 [Reference]         | 0.88 (0.57-1.35)       | 0.61 (0.41-0.92)    |
| P value <sup>a</sup>                  |                       | 0.115                  | 0.005               |                       | 0.547                  | 0.018               |
| P value for trend <sup>a</sup>        |                       | 0.015                  |                     |                       | 0.051                  |                     |
| Absolute risk, % (95% CI)             | 10.21 (8.93-11.66)    | 8.53 (6.94-10.44)      | 7.85 (5.78-10.55)   | 6.68 (5.86-7.60)      | 6.77 (5.70-8.02)       | 6.07 (4.70-7.80)    |
| Incidence rate per 1000 PYs (95% CI)  | 2.78 (2.28-3.38)      | 2.15 (1.67-2.78)       | 1.96 (1.39-2.76)    | 1.51 (1.25-1.84)      | 1.30 (1.03-1.64)       | 1.01 (0.74-1.38)    |
| <sup>b</sup>                          |                       |                        |                     |                       |                        |                     |
| Numbers needed -20 years <sup>c</sup> |                       | 115                    | 78                  |                       | 401                    | 128                 |
| Cancer mortality                      |                       |                        |                     |                       |                        |                     |

|                                                      |                  |                  |                  |                   |                  |                  |
|------------------------------------------------------|------------------|------------------|------------------|-------------------|------------------|------------------|
| No. of total                                         | 1985 (56.66%)    | 1044 (28.51%)    | 534 (14.83%)     | 3293 (53.85%)     | 1889 (29.22%)    | 987 (16.93%)     |
| No. of cases/ Person years                           | 171/39484        | 75/21482         | 28/11284         | 254/69261         | 84/41266         | 51/21320         |
| HR (95% CI) <sup>a</sup>                             | 1 [Reference]    | 0.76 (0.49-1.18) | 0.47 (0.25-0.87) | 1 [Reference]     | 0.39 (0.28-0.55) | 0.42 (0.25-0.70) |
| P value <sup>a</sup>                                 |                  | 0.221            | 0.017            |                   | <0.001           | 0.001            |
| P value for trend <sup>a</sup>                       |                  | 0.003            |                  |                   | <0.001           |                  |
| Absolute risk, % (95% CI)                            | 8.61 (7.44-9.96) | 7.18 (5.73-8.96) | 5.24 (3.58-7.58) | 7.71 (6.384-8.69) | 4.45 (3.58-5.50) | 5.17 (3.91-6.79) |
| Incidence rate per 1000 PYs (95% CI)<br><sup>b</sup> | 3.26 (2.72-3.90) | 2.51 (1.95-3.23) | 1.76 (1.19-2.61) | 2.60 (2.23-3.03)  | 1.32 (1.04-1.67) | 1.37 (1.01-1.85) |
| Numbers needed -20 years <sup>c</sup>                |                  | 98               | 44               |                   | 35               | 37               |

<sup>a</sup> Adjusted for age, sex, ethnicity, poverty status, education level, body mass index, and prevalent comorbidities (including history of hypertension, diabetes, CVD, cancer, chronic bronchitis, or emphysema).

<sup>b</sup> Incidence rate for liver cancer are adjusted for age at baseline, gender, and ethnicity.

<sup>c</sup> The numbers needed to adhere to a healthy lifestyle to prevent one death in 20 years.



**Table S6. Multivariable-adjusted HRs (95% CIs) for mortality by healthy lifestyle categories according to baseline characteristics.**

| Subgroups                     |              | No. of total | No. of All-cause mortality | No. of Cardiovascular mortality | No. of Cancer mortality | Person years | All-cause mortality    |                      | Cardiovascular mortality |                      | Cancer mortality       |                      |
|-------------------------------|--------------|--------------|----------------------------|---------------------------------|-------------------------|--------------|------------------------|----------------------|--------------------------|----------------------|------------------------|----------------------|
|                               |              |              |                            |                                 |                         |              | HR(95%CI) <sup>a</sup> | P value <sup>a</sup> | HR(95%CI) <sup>a</sup>   | P value <sup>a</sup> | HR(95%CI) <sup>a</sup> | P value <sup>a</sup> |
| <b>Age at baseline, years</b> |              |              |                            |                                 |                         |              |                        |                      |                          |                      |                        |                      |
| <50                           | Unfavorable  | 1,120        | 175                        | 40                              | 46                      | 25,267       | 1 [Reference]          |                      | 1 [Reference]            |                      | 1 [Reference]          |                      |
|                               | Intermediate | 583          | 69                         | 16                              | 19                      | 13,249       | 0.96 (0.59-1.56)       | 0.862                | 1.72 (0.55-5.36)         | 0.346                | 0.81 (0.35-1.86)       | 0.621                |
|                               | Favorable    | 297          | 20                         | 7                               | 3                       | 6,787        | 0.42 (0.18-1.01)       | 0.051                | 0.40 (0.14-1.14)         | 0.085                | 0.46 (0.11-2.01)       | 0.302                |
| ≥50                           | Unfavorable  | 872          | 606                        | 185                             | 132                     | 14,231       | 1 [Reference]          |                      | 1 [Reference]            |                      | 1 [Reference]          |                      |
|                               | Intermediate | 466          | 284                        | 79                              | 61                      | 8,242        | 0.84 (0.69-1.02)       | 0.078                | 0.69 (0.48-1.01)         | 0.055                | 1.00 (0.65-1.54)       | 0.994                |
|                               | Favorable    | 240          | 129                        | 37                              | 28                      | 4,503        | 0.84 (0.64-1.11)       | 0.222                | 0.81 (0.49-1.32)         | 0.392                | 0.64 (0.36-1.15)       | 0.136                |
| <b>Gender</b>                 |              |              |                            |                                 |                         |              |                        |                      |                          |                      |                        |                      |
| Male                          | Unfavorable  | 1,119        | 505                        | 160                             | 108                     | 21,399       | 1 [Reference]          |                      | 1 [Reference]            |                      | 1 [Reference]          |                      |
|                               | Intermediate | 411          | 143                        | 36                              | 33                      | 8,389        | 0.69 (0.52-0.92)       | 0.011                | 0.41 (0.26-0.64)         | <0.001               | 0.86 (0.47-1.58)       | 0.622                |
|                               | Favorable    | 122          | 33                         | 9                               | 10                      | 2,513        | 0.66                   | 0.094                | 0.72                     | 0.433                | 0.71                   | 0.384                |

|                  |                       |              |     |     |    |    |        | (0.40-1.07)         |        | (0.32-1.63)         |       | (0.32-1.54)         |       |
|------------------|-----------------------|--------------|-----|-----|----|----|--------|---------------------|--------|---------------------|-------|---------------------|-------|
|                  |                       |              |     |     |    |    |        | 1 [Reference]       |        | 1 [Reference]       |       | 1 [Reference]       |       |
| Ethnicity        | Female                | Unfavorable  | 873 | 276 | 65 | 70 | 18,098 | 0.80<br>(0.63-1.01) | 0.062  | 1.01<br>(0.59-1.75) | 0.963 | 0.76<br>(0.47-1.21) | 0.247 |
|                  |                       | Intermediate | 638 | 210 | 59 | 47 | 13,103 | 0.66<br>(0.52-0.85) | 0.001  | 0.65<br>(0.39-1.08) | 0.096 | 0.44<br>(0.22-0.88) | 0.021 |
|                  |                       | Favorable    | 415 | 116 | 35 | 21 | 8,777  |                     |        |                     |       |                     |       |
|                  | Non-Hispanic<br>white | Unfavorable  | 779 | 341 | 97 | 82 | 15,178 | 1 [Reference]       |        | 1 [Reference]       |       | 1 [Reference]       |       |
|                  |                       | Intermediate | 384 | 169 | 50 | 41 | 7,521  | 0.74<br>(0.57-0.96) | 0.024  | 0.65<br>(0.38-1.10) | 0.107 | 0.85<br>(0.52-1.39) | 0.526 |
|                  |                       | Favorable    | 206 | 77  | 20 | 16 | 4,209  | 0.57<br>(0.43-0.75) | <0.001 | 0.51<br>(0.31-0.83) | 0.007 | 0.43<br>(0.22-0.83) | 0.013 |
|                  | Non-Hispanic<br>black | Unfavorable  | 487 | 208 | 54 | 45 | 9,375  | 1 [Reference]       |        | 1 [Reference]       |       | 1 [Reference]       |       |
|                  |                       | Intermediate | 246 | 62  | 13 | 12 | 5,303  | 0.52<br>(0.37-0.74) | <0.001 | 0.56<br>(0.28-1.12) | 0.102 | 0.49<br>(0.24-0.99) | 0.047 |
|                  |                       | Favorable    | 124 | 28  | 12 | 4  | 2,593  | 0.72<br>(0.45-1.15) | 0.167  | 1.36<br>(0.60-3.06) | 0.458 | 0.43<br>(0.16-1.15) | 0.092 |
| Mexican-American |                       | Unfavorable  | 660 | 217 | 69 | 49 | 13,569 | 1 [Reference]       |        | 1 [Reference]       |       | 1 [Reference]       |       |
|                  |                       | Intermediate | 376 | 117 | 32 | 26 | 7,690  | 1.20<br>(0.91-1.58) | 0.204  | 0.83<br>(0.43-1.60) | 0.571 | 0.94<br>(0.49-1.80) | 0.860 |
|                  |                       | Favorable    | 174 | 37  | 10 | 10 | 3,780  | 0.65<br>(0.40-1.05) | 0.079  | 0.62<br>(0.21-1.81) | 0.382 | 0.45<br>(0.18-1.15) | 0.096 |

|                          |              |       |     |     |     |        |                     |        |                     |       |                     |       |
|--------------------------|--------------|-------|-----|-----|-----|--------|---------------------|--------|---------------------|-------|---------------------|-------|
| Others                   | Unfavorable  | 66    | 15  | 5   | 2   | 1,377  | 1 [Reference]       |        | 1<br>[Reference]    |       | 1 [Reference]       |       |
|                          | Intermediate | 43    | 5   | 0   | 1   | 978    | 0.56<br>(0.20-1.52) | 0.253  | (-)                 | (-)   | (-)                 | (-)   |
|                          | Favorable    | 33    | 7   | 2   | 1   | 708    | 1.64<br>(0.39-6.95) | 0.503  | (-)                 | (-)   | (-)                 | (-)   |
| <b>Poverty status</b>    |              |       |     |     |     |        |                     |        |                     |       |                     |       |
| Yes                      | Unfavorable  | 499   | 201 | 53  | 49  | 9,670  | 1 [Reference]       |        | 1<br>[Reference]    |       | 1 [Reference]       |       |
|                          | Intermediate | 227   | 73  | 18  | 15  | 4,692  | 0.39<br>(0.26-0.57) | <0.001 | 0.56<br>(0.25-1.29) | 0.173 | 0.28<br>(0.10-0.77) | 0.014 |
|                          | Favorable    | 147   | 36  | 11  | 7   | 3,075  | 0.51<br>(0.32-0.81) | 0.005  | 0.57<br>(0.20-1.64) | 0.300 | 0.18<br>(0.04-0.75) | 0.018 |
| No                       | Unfavorable  | 1,493 | 580 | 172 | 129 | 29,828 | 1 [Reference]       |        | 1<br>[Reference]    |       | 1 [Reference]       |       |
|                          | Intermediate | 822   | 280 | 77  | 65  | 16,799 | 0.81<br>(0.63-1.03) | 0.086  | 0.68<br>(0.42-1.08) | 0.101 | 1.01<br>(0.65-1.58) | 0.965 |
|                          | Favorable    | 390   | 113 | 33  | 24  | 8,214  | 0.65<br>(0.51-0.84) | 0.001  | 0.60<br>(0.37-0.96) | 0.034 | 0.58<br>(0.32-1.07) | 0.080 |
| <b>Education</b>         |              |       |     |     |     |        |                     |        |                     |       |                     |       |
| Less than high<br>school | Unfavorable  | 909   | 457 | 143 | 98  | 16,916 | 1 [Reference]       |        | 1<br>[Reference]    |       | 1 [Reference]       |       |
|                          | Intermediate | 390   | 178 | 47  | 39  | 7,480  | 0.73<br>(0.52-1.02) | 0.068  | 0.48<br>(0.27-0.88) | 0.017 | 0.94<br>(0.38-2.36) | 0.896 |
|                          | Favorable    | 218   | 82  | 27  | 17  | 4,367  | 0.78<br>(0.48-1.25) | 0.298  | 0.52<br>(0.26-1.03) | 0.060 | 0.81<br>(0.34-1.95) | 0.644 |

|                                 |              |       |     |     |     |        |                     |       |                     |       |                     |       |
|---------------------------------|--------------|-------|-----|-----|-----|--------|---------------------|-------|---------------------|-------|---------------------|-------|
| High school or above            | Unfavorable  | 1,083 | 324 | 82  | 80  | 22,582 | 1 [Reference]       |       | 1<br>[Reference]    |       | 1 [Reference]       |       |
|                                 | Intermediate | 659   | 175 | 48  | 41  | 14,011 | 0.76<br>(0.59-0.98) | 0.035 | 0.79<br>(0.44-1.42) | 0.428 | 0.79<br>(0.51-1.23) | 0.294 |
|                                 | Favorable    | 319   | 67  | 17  | 14  | 6,923  | 0.58<br>(0.41-0.83) | 0.003 | 0.64<br>(0.38-1.10) | 0.105 | 0.39<br>(0.20-0.76) | 0.005 |
| <b>Body mass index (kg/m2)</b>  |              |       |     |     |     |        |                     |       |                     |       |                     |       |
| <25                             | Unfavorable  | 462   | 156 | 39  | 34  | 9,299  | 1 [Reference]       |       | 1<br>[Reference]    |       | 1 [Reference]       |       |
|                                 | Intermediate | 252   | 59  | 14  | 21  | 5,394  | 0.68<br>(0.48-0.96) | 0.030 | 0.70<br>(0.28-1.72) | 0.432 | 1.12<br>(0.49-2.58) | 0.788 |
|                                 | Favorable    | 163   | 35  | 8   | 7   | 3,540  | 0.55<br>(0.36-0.84) | 0.006 | 0.69<br>(0.34-1.39) | 0.298 | 0.36<br>(0.14-0.90) | 0.030 |
| ≥25                             | Unfavorable  | 1,530 | 625 | 186 | 144 | 30,199 | 1 [Reference]       |       | 1<br>[Reference]    |       | 1 [Reference]       |       |
|                                 | Intermediate | 797   | 294 | 81  | 59  | 16,097 | 0.76<br>(0.58-0.98) | 0.037 | 0.64<br>(0.41-1.00) | 0.049 | 0.82<br>(0.52-1.30) | 0.401 |
|                                 | Favorable    | 374   | 114 | 36  | 24  | 7,750  | 0.67<br>(0.50-0.89) | 0.007 | 0.56<br>(0.31-1.00) | 0.049 | 0.55<br>(0.29-1.06) | 0.073 |
| <b>Waist circumference (cm)</b> |              |       |     |     |     |        |                     |       |                     |       |                     |       |
| men < 90 and women < 85         | Unfavorable  | 387   | 91  | 20  | 19  | 8,276  | 1 [Reference]       |       | 1<br>[Reference]    |       | 1 [Reference]       |       |
|                                 | Intermediate | 232   | 34  | 6   | 14  | 5,150  | 0.77                | 0.262 | 0.76                | 0.721 | 1.69                | 0.254 |

|                                      |              |       |     |     |     |        |                     |       |                     |       |                     |       |
|--------------------------------------|--------------|-------|-----|-----|-----|--------|---------------------|-------|---------------------|-------|---------------------|-------|
|                                      |              |       |     |     |     |        | (0.48-1.22)         |       | (0.16-3.48)         |       | (0.69-4.14)         |       |
| men $\geq$ 90 and<br>women $\geq$ 85 | Favorable    | 151   | 23  | 3   | 7   | 3,348  | 0.51<br>(0.28-0.91) | 0.023 | 0.28<br>(0.04-2.10) | 0.215 | 0.75<br>(0.22-2.53) | 0.639 |
|                                      | Unfavorable  | 1,562 | 668 | 196 | 155 | 30,476 | 1 [Reference]       |       | 1<br>[Reference]    |       | 1 [Reference]       |       |
|                                      | Intermediate | 792   | 308 | 86  | 66  | 15,875 | 0.73<br>(0.58-0.91) | 0.005 | 0.66<br>(0.43-0.99) | 0.045 | 0.80<br>(0.50-1.28) | 0.353 |
|                                      | Favorable    | 372   | 119 | 38  | 24  | 7,704  | 0.64<br>(0.49-0.83) | 0.001 | 0.60<br>(0.39-0.94) | 0.027 | 0.49<br>(0.25-0.98) | 0.043 |
| <b>Hypertension</b>                  |              |       |     |     |     |        |                     |       |                     |       |                     |       |
| Yes                                  | Unfavorable  | 826   | 474 | 151 | 98  | 14,588 | 1 [Reference]       |       | 1<br>[Reference]    |       | 1 [Reference]       |       |
|                                      | Intermediate | 427   | 220 | 69  | 45  | 8,042  | 0.73<br>(0.54-1.00) | 0.050 | 0.69<br>(0.44-1.10) | 0.123 | 0.96<br>(0.57-1.61) | 0.875 |
|                                      | Favorable    | 202   | 98  | 33  | 19  | 3,852  | 0.70<br>(0.51-0.97) | 0.031 | 0.74<br>(0.47-1.15) | 0.180 | 0.62<br>(0.28-1.36) | 0.231 |
| No                                   | Unfavorable  | 1,166 | 307 | 74  | 80  | 24,910 | 1 [Reference]       |       | 1<br>[Reference]    |       | 1 [Reference]       |       |
|                                      | Intermediate | 622   | 133 | 26  | 35  | 13,449 | 0.78<br>(0.61-0.99) | 0.044 | 0.61<br>(0.25-1.50) | 0.280 | 0.72<br>(0.39-1.31) | 0.278 |
|                                      | Favorable    | 335   | 51  | 11  | 12  | 7,437  | 0.58<br>(0.40-0.84) | 0.004 | 0.35<br>(0.13-1.00) | 0.050 | 0.40<br>(0.16-1.01) | 0.052 |
| <b>Diabetes</b>                      |              |       |     |     |     |        |                     |       |                     |       |                     |       |
| Yes                                  | Unfavorable  | 368   | 245 | 75  | 40  | 6,136  | 1 [Reference]       |       | 1<br>[Reference]    |       | 1 [Reference]       |       |
|                                      | Intermediate | 180   | 119 | 33  | 22  | 2,889  | 0.73                | 0.126 | 0.65                | 0.229 | 1.14                | 0.787 |

|               |     |              |       |     |     |     |        |                                    |        |                                    |       |                                    |        |
|---------------|-----|--------------|-------|-----|-----|-----|--------|------------------------------------|--------|------------------------------------|-------|------------------------------------|--------|
| <b>CVD</b>    | No  | Favorable    | 81    | 41  | 11  | 2   | 1,494  | (0.49-1.09)<br>0.79<br>(0.45-1.39) | 0.417  | (0.32-1.31)<br>0.86<br>(0.28-2.64) | 0.798 | (0.43-3.04)<br>0.02<br>(0.00-0.12) | <0.001 |
|               |     | Unfavorable  | 1,624 | 536 | 150 | 138 | 33,361 | 1 [Reference]                      |        | 1<br>[Reference]                   |       | 1 [Reference]                      |        |
|               |     | Intermediate | 869   | 234 | 62  | 58  | 18,603 | 0.76<br>(0.60-0.96)                | 0.022  | 0.69<br>(0.40-1.20)                | 0.190 | 0.77<br>(0.49-1.21)                | 0.262  |
|               |     | Favorable    | 456   | 108 | 33  | 29  | 9,796  | 0.61<br>(0.45-0.83)                | 0.001  | 0.55<br>(0.33-0.92)                | 0.023 | 0.55<br>(0.28-1.06)                | 0.074  |
|               | Yes | Unfavorable  | 191   | 146 | 62  | 27  | 2,590  | 1 [Reference]                      |        | 1<br>[Reference]                   |       | 1 [Reference]                      |        |
|               |     | Intermediate | 79    | 67  | 23  | 10  | 1,023  | 0.74<br>(0.52-1.06)                | 0.098  | 0.52<br>(0.29-0.92)                | 0.025 | 1.23<br>(0.41-3.64)                | 0.711  |
|               |     | Favorable    | 20    | 15  | 6   | 1   | 316    | 0.74<br>(0.29-1.88)                | 0.524  | 0.84<br>(0.19-3.65)                | 0.816 | 0.29<br>(0.03-2.64)                | 0.273  |
|               |     | Unfavorable  | 1,801 | 635 | 163 | 151 | 36,908 | 1 [Reference]                      |        | 1<br>[Reference]                   |       | 1 [Reference]                      |        |
|               | No  | Intermediate | 970   | 286 | 72  | 70  | 20,468 | 0.74<br>(0.57-0.96)                | 0.026  | 0.71<br>(0.37-1.35)                | 0.297 | 0.81<br>(0.50-1.33)                | 0.413  |
|               |     | Favorable    | 517   | 134 | 38  | 30  | 10,973 | 0.63<br>(0.49-0.80)                | <0.001 | 0.56<br>(0.33-0.94)                | 0.030 | 0.50<br>(0.26-0.98)                | 0.044  |
| <b>Cancer</b> | Yes | Unfavorable  | 120   | 78  | 18  | 25  | 1,981  | 1 [Reference]                      |        | 1<br>[Reference]                   |       | 1 [Reference]                      |        |
|               |     | Intermediate | 50    | 28  | 6   | 9   | 884    | 0.68                               | 0.182  | 0.48                               | 0.199 | 0.55                               | 0.288  |

|                                                |     |              |       |     |     |     |        |                                    |        |                                    |       |                                    |       |
|------------------------------------------------|-----|--------------|-------|-----|-----|-----|--------|------------------------------------|--------|------------------------------------|-------|------------------------------------|-------|
| <b>Emphysema or<br/>chronic<br/>bronchitis</b> | No  | Favorable    | 27    | 16  | 7   | 4   | 439    | (0.39-1.20)<br>0.74<br>(0.43-1.28) | 0.282  | (0.15-1.48)<br>1.92<br>(0.75-4.92) | 0.173 | (0.18-1.67)<br>0.38<br>(0.15-1.02) | 0.054 |
|                                                |     | Unfavorable  | 1,872 | 703 | 207 | 153 | 37,517 | 1 [Reference]                      |        | 1<br>[Reference]                   |       | 1 [Reference]                      |       |
|                                                |     | Intermediate | 999   | 325 | 89  | 71  | 20,607 | 0.76<br>(0.61-0.94)                | 0.010  | 0.67<br>(0.42-1.07)                | 0.095 | 0.92<br>(0.61-1.39)                | 0.692 |
|                                                |     | Favorable    | 510   | 133 | 37  | 27  | 10,851 | 0.63<br>(0.48-0.84)                | 0.002  | 0.47<br>(0.30-0.75)                | 0.002 | 0.51<br>(0.25-1.07)                | 0.075 |
|                                                | Yes | Unfavorable  | 168   | 96  | 24  | 25  | 2,843  | 1 [Reference]                      |        | 1<br>[Reference]                   |       | 1 [Reference]                      |       |
|                                                |     | Intermediate | 55    | 26  | 8   | 4   | 958    | 0.73<br>(0.36-1.47)                | 0.377  | 0.39<br>(0.15-0.98)                | 0.045 | (-)                                | (-)   |
|                                                |     | Favorable    | 25    | 8   | 3   | 0   | 517    | 0.45<br>(0.30-0.67)                | <0.001 | 0.63<br>(0.15-2.62)                | 0.526 | (-)                                | (-)   |
|                                                |     | Unfavorable  | 1,824 | 685 | 201 | 153 | 36,655 | 1 [Reference]                      |        | 1<br>[Reference]                   |       | 1 [Reference]                      |       |
|                                                | No  | Intermediate | 994   | 327 | 87  | 76  | 20,533 | 0.73<br>(0.59-0.89)                | 0.003  | 0.62<br>(0.37-1.04)                | 0.071 | 0.90<br>(0.57-1.41)                | 0.643 |
|                                                |     | Favorable    | 512   | 141 | 41  | 31  | 10,773 | 0.65<br>(0.51-0.84)                | 0.001  | 0.57<br>(0.35-0.92)                | 0.020 | 0.57<br>(0.31-1.03)                | 0.064 |

<sup>a</sup> Adjusted for age, sex, ethnicity, poverty status, education level, body mass index, and prevalent comorbidities (including history of hypertension, diabetes, CVD, cancer, chronic bronchitis, or emphysema).

**Table S7. Association between combinations of the healthy lifestyle factors (Prevalence >5%) and risk of liver cancer.**

| Healthy lifestyle score | SMK                                                                                 | ALCO | DIET                                                                                | PA                                                                                  | Prevalence (%) | All-cause mortality                |                             | Cardiovascular mortality           |                             | Cancer mortality                   |                             |
|-------------------------|-------------------------------------------------------------------------------------|------|-------------------------------------------------------------------------------------|-------------------------------------------------------------------------------------|----------------|------------------------------------|-----------------------------|------------------------------------|-----------------------------|------------------------------------|-----------------------------|
|                         |                                                                                     |      |                                                                                     |                                                                                     |                | Hazard Ratio (95% CI) <sup>a</sup> | <i>P</i> value <sup>a</sup> | Hazard Ratio (95% CI) <sup>a</sup> | <i>P</i> value <sup>a</sup> | Hazard Ratio (95% CI) <sup>a</sup> | <i>P</i> value <sup>a</sup> |
| NAFLD                   |                                                                                     |      |                                                                                     |                                                                                     |                |                                    |                             |                                    |                             |                                    |                             |
| Score 0                 |                                                                                     |      |                                                                                     |    | 753 (22.06)    | 1 [Reference]                      |                             | 1 [Reference]                      |                             | 1 [Reference]                      |                             |
|                         |                                                                                     |      |                                                                                     |                                                                                     | 247 (8.48)     | 0.82 (0.56-1.20)                   | 0.303                       | 0.67 (0.34-1.34)                   | 0.258                       | 0.99 (0.53-1.85)                   | 0.967                       |
| Score 1                 |    |      |    |    | 447 (12.52)    | 0.87 (0.67-1.14)                   | 0.325                       | 0.90 (0.54-1.48)                   | 0.678                       | 0.61 (0.37-1.00)                   | 0.051                       |
|                         |                                                                                     |      |                                                                                     |                                                                                     | 491 (12.28)    | 0.53 (0.36-0.77)                   | 0.001                       | 0.58 (0.25-1.34)                   | 0.202                       | 0.47 (0.22-1.01)                   | 0.052                       |
| Score 2                 |    |      |    |    | 226 (8.21)     | 0.76 (0.54-1.07)                   | 0.116                       | 0.73 (0.30-1.80)                   | 0.498                       | 0.93 (0.46-1.87)                   | 0.837                       |
|                         |                                                                                     |      |                                                                                     |                                                                                     | 191 (5.83)     | 0.43 (0.30-0.61)                   | <0.001                      | 0.57 (0.35-0.95)                   | 0.029                       | 0.33 (0.12-0.91)                   | 0.033                       |
| Score 3                 |    |      |    |    | 371 (9.12)     | 0.52 (0.36-0.75)                   | <0.001                      | 0.30 (0.17-0.55)                   | <0.001                      | 0.41 (0.19-0.87)                   | 0.021                       |
|                         |                                                                                     |      |                                                                                     |                                                                                     | 211 (7.47)     | 0.54 (0.37-0.80)                   | 0.002                       | 0.40 (0.18-0.90)                   | 0.027                       | 0.31 (0.12-0.75)                   | 0.010                       |
| No NAFLD                |                                                                                     |      |                                                                                     |                                                                                     |                |                                    |                             |                                    |                             |                                    |                             |
| Score 0                 |                                                                                     |      |                                                                                     |    | 1261 (21.28)   | 1 [Reference]                      |                             | 1 [Reference]                      |                             | 1 [Reference]                      |                             |
|                         |                                                                                     |      |                                                                                     |                                                                                     | 587 (11.06)    | 1.02 (0.83-1.25)                   | 0.857                       | 1.39 (0.87-2.21)                   | 0.169                       | 0.85 (0.51-1.41)                   | 0.526                       |
| Score 1                 |   |      |    |    | 570 (9.46)     | 0.81 (0.64-1.04)                   | 0.100                       | 0.93 (0.62-1.40)                   | 0.738                       | 0.54 (0.29-1.00)                   | 0.051                       |
|                         |                                                                                     |      |                                                                                     |                                                                                     | 795 (11.05)    | 0.44 (0.31-0.62)                   | <0.001                      | 0.67 (0.36-1.26)                   | 0.214                       | 0.30 (0.14-0.66)                   | 0.003                       |
| Score 2                 |  |      |   |   | 409 (8.35)     | 0.61 (0.47-0.78)                   | <0.001                      | 0.83 (0.51-1.36)                   | 0.462                       | 0.29 (0.16-0.50)                   | <0.001                      |
|                         |                                                                                     |      |                                                                                     |                                                                                     | 496 (8.16)     | 0.64 (0.45-0.91)                   | 0.013                       | 0.59 (0.27-1.29)                   | 0.188                       | 0.37 (0.17-0.80)                   | 0.011                       |
| Score 3                 |  |      |  |  | 588 (8.62)     | 0.51 (0.38-0.69)                   | <0.001                      | 0.89 (0.49-1.62)                   | 0.708                       | 0.21 (0.10-0.42)                   | <0.001                      |
|                         |                                                                                     |      |                                                                                     |                                                                                     | 467 (9.79)     | 0.56 (0.43-0.74)                   | <0.001                      | 0.44 (0.26-0.75)                   | 0.003                       | 0.40 (0.21-0.78)                   | 0.008                       |

<sup>a</sup> Adjusted for age, sex, ethnicity, poverty status, education level, body mass index, and prevalent comorbidities (including history of hypertension, diabetes, CVD, cancer, chronic bronchitis, or emphysema).



**Figure S1. Association between combinations of the healthy lifestyle factors (Proportion >5%) and risk of all-cause mortality/cardiovascular mortality/cancer mortality in the sub cohort without NAFLD.** Adjusted for age, sex, ethnicity, poverty status, education level, body mass index, and prevalent comorbidities (including history of hypertension, diabetes, CVD, cancer, chronic bronchitis or emphysema).

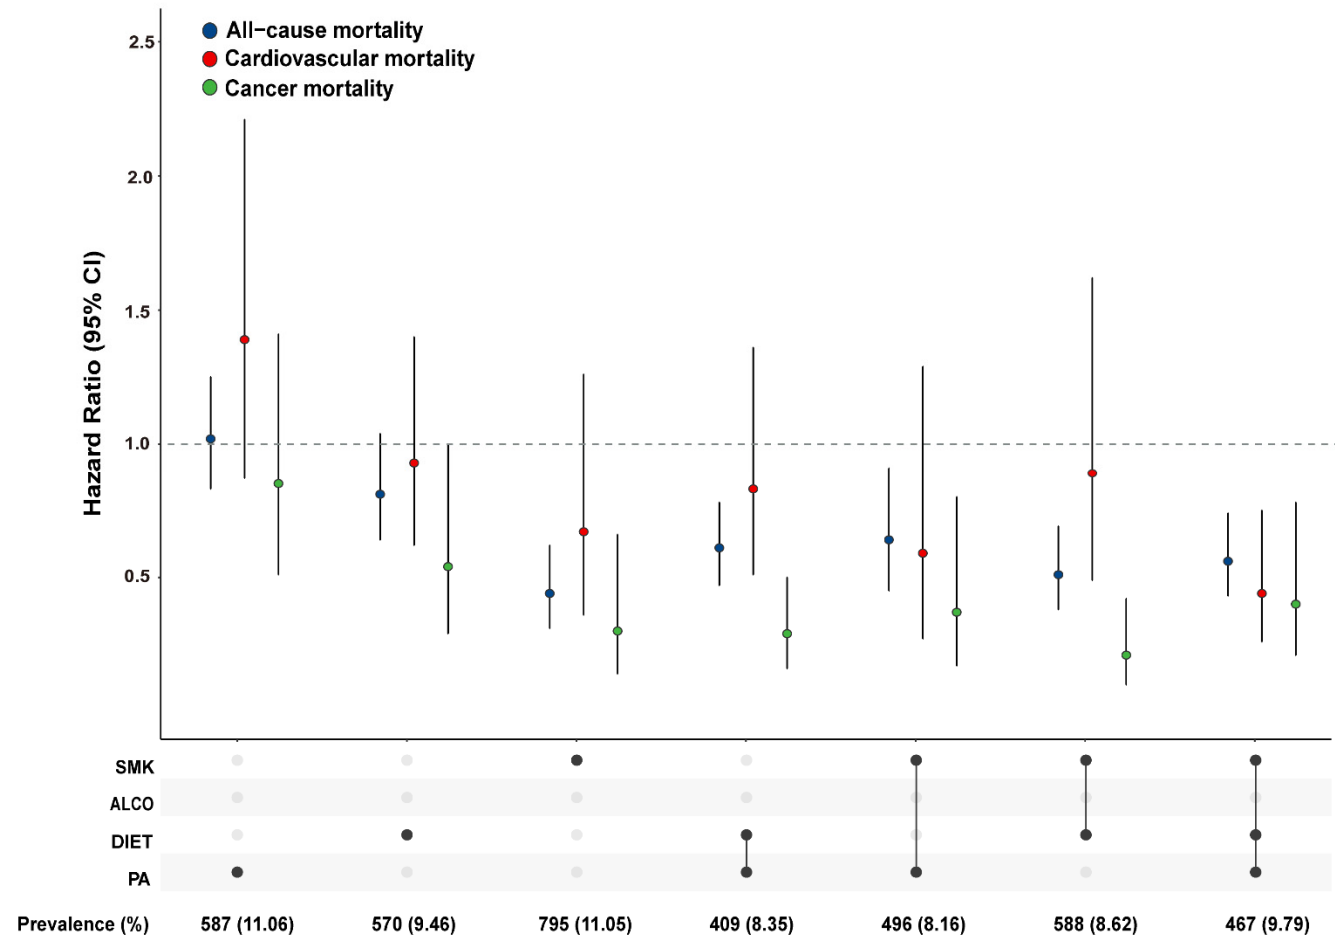

Supplement: s1 [file s1]
